# Supplementary material
Source: MDPI journal article supplement (https://www.mdpi.com/2413-4155/4/1/8)
Supplement: s1 [file s1]

## Supplementary file

Table S1. Inhibitory activity of various commensal *Neisseria* and other species in agar overlay assay .....2

Table S2. Clinical study, anatomical site, year of isolation and antimicrobial susceptibilities of isolates used in the study .....3

Table S1. Inhibitory activity of various commensal *Neisseria* and other species in agar overlay assay

| Study                   | Sample.IDX | Species                                 | Pitting | Target strains zone of inhibition (mm) |       |       |            |          |          |        |        |        |        |     |     |     |     |         |         |         |         |         |         |         |         |         |         |         |         |
|-------------------------|------------|-----------------------------------------|---------|----------------------------------------|-------|-------|------------|----------|----------|--------|--------|--------|--------|-----|-----|-----|-----|---------|---------|---------|---------|---------|---------|---------|---------|---------|---------|---------|---------|
|                         |            |                                         |         | WHO F                                  | WHO W | WHO X | ATCC 49226 | MohG 003 | MohG 004 | 18.527 | 18.530 | 18.531 | 19.572 | RL1 | RL3 | RL7 | RL8 | 07. 110 | 07. 177 | 21. 162 | 21. 163 | 21. 164 | 21. 165 | 21. 166 | 21. 167 | 21. 168 | 21. 169 | 21. 186 | 21. 189 |
| Other Neisseria species |            |                                         |         |                                        |       |       |            |          |          |        |        |        |        |     |     |     |     |         |         |         |         |         |         |         |         |         |         |         |         |
| Prego                   | 19040471/1 | Neisseria meningitidis                  |         | -                                      | -     | -     | -          | -        | -        | -      | -      | -      | -      | -   | -   | -   | -   | -       | -       | -       | -       | -       | -       | -       | -       | -       | -       | -       | -       |
| Prego                   | 19040874/2 | Neisseria meningitidis                  |         | -                                      | -     | -     | -          | -        | -        | -      | -      | -      | -      | -   | -   | -   | -   | -       | -       | -       | -       | -       | -       | -       | -       | -       | -       | -       | -       |
| Prego                   | 19040900/1 | Neisseria subflava/ flavescens/perflava |         | -                                      | -     | -     | -          | -        | -        | -      | -      | -      | -      | -   | -   | -   | -   | -       | -       | -       | -       | -       | -       | -       | -       | -       | -       | -       | -       |
| Prego                   | 19051904/2 | Neisseria subflava/ flavescens/perflava |         | -                                      | -     | -     | -          | -        | -        | -      | -      | -      | -      | -   | -   | -   | -   | -       | -       | -       | -       | -       | -       | -       | -       | -       | -       | -       | -       |
| Prego                   | 19111422/7 | Neisseria sp.                           |         | -                                      | -     | -     | -          | -        | -        | -      | -      | -      | -      | -   | -   | -   | -   | -       | -       | -       | -       | -       | -       | -       | -       | -       | -       | -       | -       |
| Comcom                  | Co000761/1 | Neisseria lactamica                     |         | -                                      | -     | -     | -          | -        | -        | -      | -      | -      | -      | -   | -   | -   | -   | -       | -       | -       | -       | -       | -       | -       | -       | -       | -       | -       | -       |
| Comcom                  | Co000761/7 | Neisseria oralis                        |         | -                                      | -     | -     | -          | -        | -        | -      | -      | -      | -      | -   | -   | -   | -   | -       | -       | -       | -       | -       | -       | -       | -       | -       | -       | -       | -       |
| Comcom                  | Co000763/1 | Neisseria oralis                        |         | -                                      | -     | -     | -          | -        | -        | -      | -      | -      | -      | -   | -   | -   | -   | -       | -       | -       | -       | -       | -       | -       | -       | -       | -       | -       | -       |
| Comcom                  | Co000765/1 | Neisseria meningitidis                  |         | -                                      | -     | -     | -          | -        | -        | -      | -      | -      | -      | -   | -   | -   | -   | -       | -       | -       | -       | -       | -       | -       | -       | -       | -       | -       | -       |
| Comcom                  | Co000767/3 | Neisseria elongata                      |         | -                                      | -     | -     | -          | -        | -        | -      | -      | -      | -      | -   | -   | -   | -   | -       | -       | -       | -       | -       | -       | -       | -       | -       | -       | -       | -       |
| Comcom                  | Co000769/3 | Neisseria cinerea                       |         | -                                      | -     | -     | -          | -        | -        | -      | -      | -      | -      | -   | -   | -   | -   | -       | -       | -       | -       | -       | -       | -       | -       | -       | -       | -       | -       |
| Comcom                  | Co000771/1 | Neisseria lactamica                     |         | -                                      | -     | -     | -          | -        | -        | -      | -      | -      | -      | -   | -   | -   | -   | -       | -       | -       | -       | -       | -       | -       | -       | -       | -       | -       | -       |
| Comcom                  | Co000776/1 | Neisseria oralis                        |         | -                                      | -     | -     | -          | -        | -        | -      | -      | -      | -      | -   | -   | -   | -   | -       | -       | -       | -       | -       | -       | -       | -       | -       | -       | -       | -       |
| Comcom                  | Co000776/4 | Neisseria cinerea                       |         | -                                      | -     | -     | -          | -        | -        | -      | -      | -      | -      | -   | -   | -   | -   | -       | -       | -       | -       | -       | -       | -       | -       | -       | -       | -       | -       |
| Comcom                  | Co000777/2 | Neisseria subflava/ flavescens/perflava |         | -                                      | -     | -     | -          | -        | -        | -      | -      | -      | -      | -   | -   | -   | -   | -       | -       | -       | -       | -       | -       | -       | -       | -       | -       | -       | -       |
| Comcom                  | Co000777/4 | Neisseria subflava/ flavescens/perflava |         | -                                      | -     | -     | -          | -        | -        | -      | -      | -      | -      | -   | -   | -   | -   | -       | -       | -       | -       | -       | -       | -       | -       | -       | -       | -       | -       |
| N.mucosa/macacae group  |            |                                         |         |                                        |       |       |            |          |          |        |        |        |        |     |     |     |     |         |         |         |         |         |         |         |         |         |         |         |         |
| Prego                   | 19041762/2 | Neisseria mucosa/macacae                | P       | -                                      | -     | -     | -          | -        | -        | -      | -      | -      | -      | -   | -   | -   | -   | -       | -       | -       | -       | -       | -       | -       | -       | -       | -       | -       | -       |
| Prego                   | 19051904/1 | Neisseria mucosa/macacae                | /       | -                                      | -     | -     | -          | -        | -        | -      | -      | -      | -      | -   | -   | -   | -   | -       | -       | -       | -       | -       | -       | -       | -       | -       | -       | -       | -       |
| Prego                   | 19052394/2 | Neisseria mucosa/macacae                | /       | -                                      | -     | -     | -          | -        | -        | -      | -      | -      | -      | -   | -   | -   | -   | -       | -       | -       | -       | -       | -       | -       | -       | -       | -       | -       | -       |
| Prego                   | 19062968/1 | Neisseria mucosa/macacae                | P       | -                                      | -     | -     | -          | -        | -        | -      | -      | -      | -      | -   | -   | -   | -   | -       | -       | -       | -       | -       | -       | -       | -       | -       | -       | -       | -       |
| Prego                   | 19081774/2 | Neisseria mucosa/macacae                | P       | -                                      | -     | -     | -          | -        | -        | -      | -      | -      | -      | -   | -   | -   | -   | -       | -       | -       | -       | -       | -       | -       | -       | -       | -       | -       | -       |
| Prego                   | 19111422/4 | Neisseria mucosa/macacae                | P       | -                                      | -     | -     | -          | -        | -        | -      | -      | -      | -      | -   | -   | -   | -   | -       | -       | -       | -       | -       | -       | -       | -       | -       | -       | -       | -       |
| Comcom                  | Co000770/5 | Neisseria mucosa/macacae                | P       | -                                      | -     | -     | -          | -        | -        | -      | -      | -      | -      | -   | -   | -   | -   | -       | -       | -       | -       | -       | -       | -       | -       | -       | -       | -       | -       |
| Comcom                  | Co000771/4 | Neisseria mucosa/macacae                | /       | -                                      | -     | -     | -          | -        | -        | -      | -      | -      | -      | -   | -   | -   | -   | -       | -       | -       | -       | -       | -       | -       | -       | -       | -       | -       | -       |
| Comcom                  | Co000772/3 | Neisseria mucosa/macacae                | /       | -                                      | -     | -     | -          | -        | -        | -      | -      | -      | -      | -   | -   | -   | -   | -       | -       | -       | -       | -       | -       | -       | -       | -       | -       | -       | -       |
| Comcom                  | Co000773/3 | Neisseria mucosa/macacae                | P       | -                                      | -     | -     | -          | -        | -        | -      | -      | -      | -      | -   | -   | -   | -   | -       | -       | -       | -       | -       | -       | -       | -       | -       | -       | -       | -       |
| Comcom                  | Co000779/1 | Neisseria mucosa/macacae                | P       | -                                      | -     | -     | -          | -        | -        | -      | -      | -      | -      | -   | -   | -   | -   | -       | -       | -       | -       | -       | -       | -       | -       | -       | -       | -       | -       |
| Comcom                  | Co000783/3 | Neisseria mucosa/macacae                | /       | -                                      | -     | -     | -          | -        | -        | -      | -      | -      | -      | -   | -   | -   | -   | -       | -       | -       | -       | -       | -       | -       | -       | -       | -       | -       | -       |
| Comcom                  | Co000787/3 | Neisseria mucosa/macacae                | P       | -                                      | -     | -     | -          | -        | -        | -      | -      | -      | -      | -   | -   | -   | -   | -       | -       | -       | -       | -       | -       | -       | -       | -       | -       | -       | -       |
| Comcom                  | Co000788/1 | Neisseria mucosa/macacae                | /       | -                                      | -     | -     | -          | -        | -        | -      | -      | -      | -      | -   | -   | -   | -   | -       | -       | -       | -       | -       | -       | -       | -       | -       | -       | -       | -       |
| Collection              | ITM 1621   | Neisseria mucosa (ITM 1621)             | /       | -                                      | -     | -     | -          | -        | -        | -      | -      | -      | -      | -   | -   | -   | -   | -       | -       | -       | -       | -       | -       | -       | -       | -       | -       | -       | -       |
| Collection              | ATCC 19696 | Neisseria mucosa (ITM 2252)             | /       | -                                      | -     | -     | -          | -        | -        | -      | -      | -      | -      | -   | -   | -   | -   | -       | -       | -       | -       | -       | -       | -       | -       | -       | -       | -       | -       |
| Collection              | ATCC 19697 | Neisseria mucosa (ITM 3369)             | P       | -                                      | -     | -     | -          | -        | -        | -      | -      | -      | -      | -   | -   | -   | -   | -       | -       | -       | -       | -       | -       | -       | -       | -       | -       | -       | -       |
| Collection              | ATCC 19695 | Neisseria mucosa (ITM 3375)             | /       | -                                      | -     | -     | -          | -        | -        | -      | -      | -      | -      | -   | -   | -   |     |         |         |         |         |         |         |         |         |         |         |         |         |

-: no inhibition, NA: Not available, P:pitting observed, /: no pitting observed

Table S2. Clinical study, anatomical site, year of isolation and antimicrobial susceptibilities of isolates used in the study

| Study                          | Sample.IDX            | Species                                 | MIC (µg/ml)  |             |               | Year | Site    |
|--------------------------------|-----------------------|-----------------------------------------|--------------|-------------|---------------|------|---------|
|                                |                       |                                         | Azithromycin | Ceftriaxone | Ciprofloxacin |      |         |
| <u>Other Neisseria species</u> |                       |                                         |              |             |               |      |         |
| Prego                          | 19040471/1            | Neisseria meningitidis                  | 0.380        | <0,016      | 0.003         | 2019 | Pharynx |
| Prego                          | 19040874/2            | Neisseria meningitidis                  | 2            | 0.016       | 0.004         | 2019 | Pharynx |
| Prego                          | 19040900/1            | Neisseria subflava/ flavescens/perflava | >256         | 0.094       | 0.380         | 2019 | Pharynx |
| Prego                          | 19051904/2            | Neisseria subflava/ flavescens/perflava | 2            | 0.064       | 0.380         | 2019 | Pharynx |
| Prego                          | 19111422/7            | Neisseria sp.                           | 1            | 0.032       | 0.016         | 2019 | Pharynx |
| Comcom                         | Co000761/1            | Neisseria lactamica                     | 2            | <0,016      | 0.190         | 2020 | Pharynx |
| Comcom                         | Co000761/7            | Neisseria oralis                        | 2            | 0.064       | 0.016         | 2020 | Pharynx |
| Comcom                         | Co000763/1            | Neisseria oralis                        | 1            | 0.032       | 0.012         | 2020 | Pharynx |
| Comcom                         | Co000765/1            | Neisseria meningitidis                  | 0.500        | <0,016      | 0.004         | 2020 | Pharynx |
| Comcom                         | Co000767/3            | Neisseria elongata                      | 0.500        | 0.190       | 0.004         | 2020 | Pharynx |
| Comcom                         | Co000769/3            | Neisseria cinerea                       | 1            | <0,016      | 0.006         | 2020 | Pharynx |
| Comcom                         | Co000771/1            | Neisseria lactamica                     | 1            | <0,016      | 0.064         | 2020 | Pharynx |
| Comcom                         | Co000776/1            | Neisseria oralis                        | 4            | 0.047       | 0.016         | 2020 | Pharynx |
| Comcom                         | Co000776/4            | Neisseria cinerea                       | 24           | <0,016      | 0.032         | 2020 | Pharynx |
| Comcom                         | Co000777/2            | Neisseria subflava/ flavescens/perflava | 0.250        | 0.047       | 0.500         | 2020 | Pharynx |
| Comcom                         | Co000777/4            | Neisseria subflava/ flavescens/perflava | >256         | 0.047       | 2             | 2020 | Pharynx |
| <u>N.mucosa/macacae group</u>  |                       |                                         |              |             |               |      |         |
| Prego                          | 19041762/2            | Neisseria mucosa/macacae                | 3            | 0.03        | 0.02          | 2019 | Pharynx |
| Prego                          | 19051904/1            | Neisseria mucosa/macacae                | 2            | 0.05        | 0.25          | 2019 | Pharynx |
| Prego                          | 19052394/2            | Neisseria mucosa/macacae                | 4            | 0.03        | 0.01          | 2019 | Pharynx |
| Prego                          | 19062968/1            | Neisseria mucosa/macacae                | 16           | 0.06        | 6             | 2019 | Pharynx |
| Prego                          | 19081774/2            | Neisseria mucosa/macacae                | 24           | 0.09        | 0.02          | 2019 | Pharynx |
| Prego                          | 19111422/4            | Neisseria mucosa/macacae                | 1.5          | 0.03        | 0.02          | 2019 | Pharynx |
| Comcom                         | Co000770/5            | Neisseria mucosa/macacae                | 3            | 0.05        | 0.02          | 2020 | Pharynx |
| Comcom                         | Co000771/4            | Neisseria mucosa/macacae                | 6            | 0.06        | 0.02          | 2020 | Pharynx |
| Comcom                         | Co000772/3            | Neisseria mucosa/macacae                | 4            | 0.03        | 0.01          | 2020 | Pharynx |
| Comcom                         | Co000773/3            | Neisseria mucosa/macacae                | 2            | 0.03        | 0.01          | 2020 | Pharynx |
| Comcom                         | Co000779/1            | Neisseria mucosa/macacae                | 2            | 0.13        | 0.03          | 2020 | Pharynx |
| Comcom                         | Co000783/3            | Neisseria mucosa/macacae                | 6            | 0.03        | 0.01          | 2020 | Pharynx |
| Comcom                         | Co000787/3            | Neisseria mucosa/macacae                | 4            | 0.09        | 0.06          | 2020 | Pharynx |
| Comcom                         | Co000788/1            | Neisseria mucosa/macacae                | 2            | 0.03        | 0.01          | 2020 | Pharynx |
| Collection                     | ITM 1621              | Neisseria mucosa (ITM 1621)             |              |             |               | 1977 | Vaginal |
| Collection                     | ATCC 19696            | Neisseria mucosa (ITM 2252)             | NA           | NA          | NA            | NA   | NA      |
| Collection                     | ATCC 19697            | Neisseria mucosa (ITM 3369)             | NA           | NA          | NA            | NA   | NA      |
| Collection                     | ATCC 19695            | Neisseria mucosa (ITM 3375)             | NA           | NA          | NA            | NA   | NA      |
| Collection                     | ATCC 19694            | Neisseria mucosa (ITM 3380)             | NA           | NA          | NA            | NA   | NA      |
| Collection                     | ATCC 25999            | Neisseria mucosa (ITM 3391)             | NA           | NA          | NA            | NA   | Pharynx |
| Collection                     | ATCC 25996            | Neisseria mucosa (DSM4631)              | NA           | NA          | NA            | NA   | NA      |
| Collection                     | <u>Other isolates</u> |                                         |              |             |               |      |         |
| Collection                     | ATCC 29213            | Staphylococcus aureus                   | NA           | NA          | NA            | NA   | NA      |
| Collection                     | ATCC 25923            | Staphylococcus aureus                   | NA           | NA          | NA            | NA   | NA      |
| Collection                     | ATCC 49619            | Streptococcus pneumoniae                | NA           | NA          | NA            | NA   | NA      |
| Collection                     | ATCC 25922            | Escherichia coli                        | NA           | NA          | NA            | NA   | NA      |
| Collection                     | LMG 14238             | Streptococcus pyogenes                  | NA           | NA          | NA            | NA   | NA      |
| Collection                     | LMG 9479              | Lactobacillus crispatus                 | NA           | NA          | NA            | NA   | NA      |

NA: Not available
